# Supplementary material for: SCN10A Mutation in a Patient with Erythromelalgia Enhances C-Fiber Activity Dependent Slowing
Source: PubMed Central journal article supplement (PMC5012686; doi:10.1371/journal.pone.0161789), 2016-09-06
Supplement: pone.0161789.s007.pdf [file pone.0161789.s007.pdf]

| CM_healthy_ADS1/8 | CM_healthy_ADS tot | CM_healthy_cv | CMI_healthy_ADS1/8 |
|-------------------|--------------------|---------------|--------------------|
| 0,430686406       | 1,830417227        | 1,049798116   | 1,184068891        |
| -0,854160076      | 1,486871243        | 0,711800063   | 0,92879257         |
| 0,444983819       | 3,05420712         | 1,011326861   | 0,892857143        |
| 0,702151755       | 2,718006795        | 0,928652322   | 0,420248329        |
| 0,2852754         | 2,611367127        | 0,899714725   | 2,55839822         |
| 0,281690141       | 1,920614597        | 1,04993598    | 2,220812183        |
| 0,479846449       | 2,471209213        | 0,983685221   | 3,069520491        |
| 0,327408793       | 2,502338634        | 0,958840037   | 2,027345592        |
| 0,325884544       | 2,420856611        | 0,954376164   | 2,678720911        |
| 0,175262894       | 2,278417626        | 0,685274946   | 2,069068175        |
| 0,17699115        | 2,101769912        | 1,02653981    | 4,458354624        |
| 0,300816502       | 2,965191233        | 0,907079646   | 1,4111734          |
| 0,181598063       | 2,481840194        | 0,862976216   | 1,174277726        |
| 0,594059406       | 2,347949081        | 1,02905569    | 2,018153727        |
| -0,424005219      | 1,272015656        | 0,961810467   | 1,616272677        |
| 0,386100386       | 3,474903475        | 1,108936725   | 2,396284176        |
| 0,472440945       | 4,094488189        | 0,965250965   | 0,821052632        |
| -0,106202209      | 1,677994902        | 0,787401575   | 2,033940604        |
| 1,010710514       | 4,314376226        | 0,892098556   | 1,518942886        |
| 0,141442716       | 1,697312588        | 0,663750189   | 3,205643914        |
| 0                 | 3,43217371         | 0,961810467   | 2,100505185        |
| -0,03312946       | 2,155963303        | 0,895915679   | 2,131519274        |
| 0,479413424       | 1,240834743        | 0,793836096   | 0,680619364        |
| 0,089928058       | 0,899280576        | 1,044852192   | 1,94105979         |
| -0,158290463      | 1,028888009        | 1,156232375   | 0,399828645        |
| 0,088731145       | 1,197870453        | 0,92176259    | 1,784243755        |
| 0,019278967       | 1,657991132        | 0,811238623   | 1,780334155        |
| 0,175394638       | 1,854171887        | 0,998225377   | 1,179941003        |
| 0,576296668       | 2,405412177        | 0,963948332   | 2,095792677        |
| 0,205620288       | 1,576422207        | 0,914557755   | 1,659751037        |
| 0,220507166       | 1,653803749        | 1,277875219   | 10,52344602        |
| 0,325450206       | 2,64699501         | 1,005254741   | 1,364113326        |
| 0,252873563       | 2,781609195        | 0,970231533   | 1,839348079        |
| 0,123670542       | 3,141231759        | 0,954653938   | 1,59512761         |
| 0,241254524       | 3,015681544        | 0,942528736   | 1,944110623        |
| 0,117508813       | 1,292596945        | 1,014098442   | 1,776530243        |
| 0,182982617       | 2,996340348        | 0,989143546   |                    |
| 0,428410372       | 3,404735062        |               |                    |
| 0,463678516       | 3,576948554        |               |                    |
| 0,26172301        | 2,726281352        |               |                    |
| 0,371287129       | 3,589108911        |               |                    |
| 0,220804711       | 2,870461237        |               |                    |
| 0,221595488       | 3,40451249         |               |                    |
| 0,195121951       | 1,697560976        |               |                    |
| 0,422960725       | 3,726082578        |               |                    |
| 1,219268439       | 3,63781731         |               |                    |
| 0,416204218       | 2,413984462        |               |                    |
| 0,24219591        | 4,117330463        |               |                    |
| 0,061211998       | 1,387471945        |               |                    |

|              |             |
|--------------|-------------|
| 0,074589756  | 1,616111387 |
| 0,799175045  | 2,294405775 |
| 0,35035035   | 1,601601602 |
| 0,203183204  | 2,031832035 |
| 0,337623971  | 2,679890272 |
| 0,354706685  | 2,07366985  |
| 0,259924386  | 1,512287335 |
| 0,394650296  | 2,872177154 |
| 0,282558438  | 3,236578474 |
| 0,25083612   | 3,210702341 |
| 0,187090739  | 2,432179607 |
| 0,333044983  | 3,871107266 |
| 0,091340884  | 1,680672269 |
| 0,18496721   | 1,96737851  |
| 0,264284758  | 2,8703332   |
| 0,381367475  | 2,01579951  |
| 0,021748586  | 1,979121357 |
| -0,044540378 | 1,202590194 |
| -0,010607266 | 2,916998144 |
| 0,224071703  | 2,272727273 |
| 0,247770069  | 1,833498513 |
| 0,716845878  | 4,356217259 |
| 0,19846192   | 2,282312081 |
| 0,30261348   | 2,640990371 |
| 0,40660737   | 3,608640407 |

| CMi_healthy_ADS tot | CMi_healthy_cv | CM_EM_ADS1/8 | CM_EM_ADS tot   |
|---------------------|----------------|--------------|-----------------|
| 6,630785791         | 0,8934338      | SLOW1/8)%    | SLOWING_TOTAL % |
| 6,08875129          | 0,856553148    |              | 2,426           |
| 6,392857143         | 0,741071429    | 0,672        | 0,996           |
| 5,692454632         | 0,343839542    | 0,032        | 1,668           |
| 10,96774194         | 0,500556174    | 0,227        | 1,637           |
| 9,877326565         | 0,867174281    | -0,047       | 1,125           |
| 10,98390576         | 0,829600133    | -0,099       | 0,696           |
| 12,49410655         | 0,730787364    | 0,114        | 1,178           |
| 10,66465763         | 0,686422233    | 0,300        | 2,003           |
| 9,705269425         | 0,64007145     | 0,506        | 1,949           |
| 11,52273889         | 0,549310169    | 0,276        | 2,370           |
| 6,611250725         | 0,908563696    | 0,302        | 0,397           |
| 6,467847158         | 0,894687791    | -0,110       | 0,954           |
| 9,762456547         | 0,463499421    | -0,022       | 1,019           |
| 10,64321056         | 0,483782298    | -0,041       | 2,413           |
| 10,70410641         | 0,46447799     | 0,050        | 1,023           |
| 8                   | 0,715789474    | -0,021       | 1,804           |
| 7,44571999          | 0,66134265     | 0,213        | 1,552           |
| 6,598182537         | 0,89995171     | 0,426        | 1,823           |
| 12,04282443         | 0,377498608    | 0,147        | 3,621           |
| 7,41823983          | 1,010369583    | 0,181        |                 |
| 10,38548753         | 0,861678005    |              |                 |
| 6,091543304         | 0,757189042    |              |                 |
| 6,687446869         | 0,935109096    |              |                 |
| 7,882336142         | 0,614022562    |              |                 |
| 8,18007137          | 1,070546253    |              |                 |
| 8,189537113         | 1,068200493    |              |                 |
| 8,259587021         | 1,209439528    |              |                 |
| 8,644161158         | 0,537719022    |              |                 |
| 8,352877503         | 0,46003969     |              |                 |
| 13,22246456         | 1,022355507    |              |                 |
| 6,67366212          | 0,786988458    |              |                 |
| 8,009313155         | 1,187427241    |              |                 |
| 7,337587007         | 1,189095128    |              |                 |
| 8,987328293         | 0,753000593    |              |                 |
| 8,442593263         | 0,742484607    |              |                 |

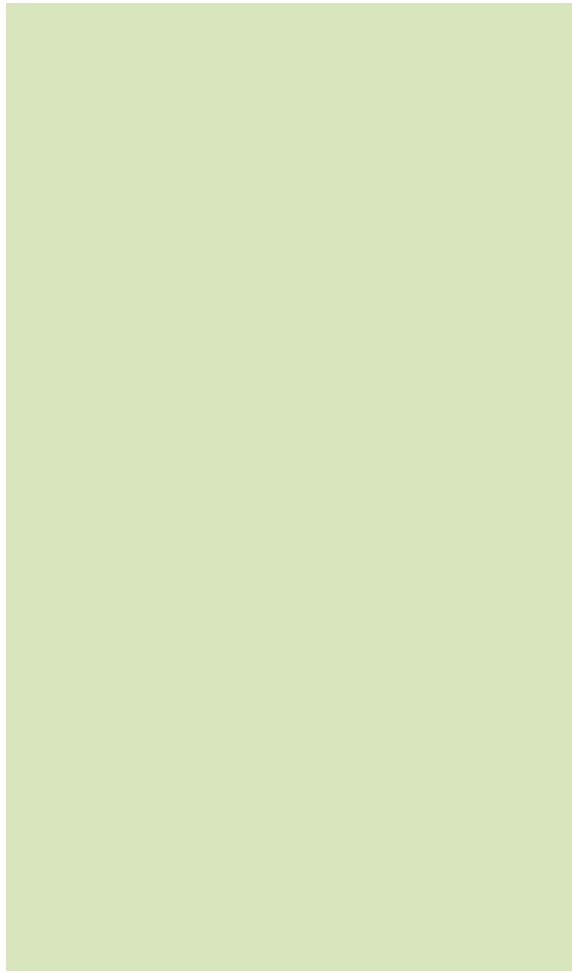

| CMi_EM_ADS1/8 | CMi_EM_ADS tot | CM_1.8Mut_ADS1/8 | CM_1.8 Mut_ADS tot |
|---------------|----------------|------------------|--------------------|
| 1,521         | 7,108          | 0,23988006       | 1,484257871        |
| 1,067         | 6,902          | 0,250065807      | 1,3556199          |
| 2,337         | 8,844          | 0,280269058      | 1,644245142        |
| 0,888         | 6,420          | 0,251968504      | 2,803149606        |
| 1,233         | 6,460          | 0,135611608      | 1,017087063        |
| 1,375         | 6,148          | 0,376789751      | 1,557397639        |
| 1,608         | 7,073          | 0,176470588      | 2,4                |
| 1,061         | 5,465          | -0,108264165     | 0,613496933        |
|               |                | 0,220264317      | 3,132648067        |

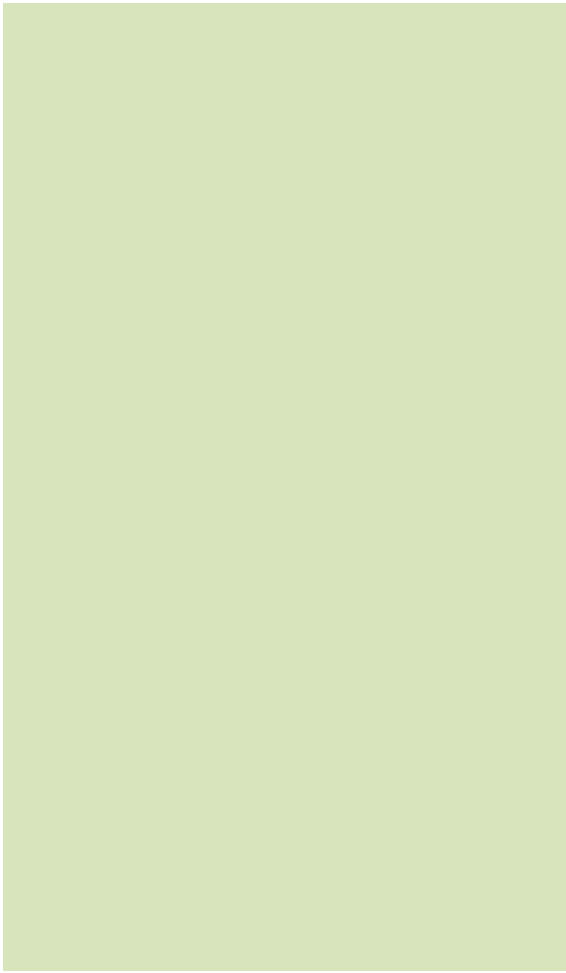

| CMi_1.8Mut_ADS1/8 | CMi_1.8Mut_ADS tot |
|-------------------|--------------------|
| 2,044161604       | 12,46745733        |
| 1,955525757       | 8,749580959        |
| 1,922635006       | 9,314438912        |
| 1,260504202       | 6,892230576        |
| 1,005961252       | 6,287257824        |
| 0,761394102       | 4,857908847        |
| 1,257800312       | 6,39625585         |
| 1,280866235       | 5,889343721        |
